# Supplementary material
Source: Frontiers journal article supplement (https://www.frontiersin.org/articles/422164)
Supplement: Data_Sheet_1.xls [file Data_Sheet_1.xls]

## Sheet: Sheet1
Supplementary Table S1. The resources, antibody titers, and protective efficacy of the injectable excipients used in this study (a)
Compound	CAS No.	Cat. No.	Company	Virus specific antibody titers (b)																				Ab. Ratio (Compound/Alum) ( C)	Survival (No. of survived mice/total)				Enhanced protective efficacy (%)	Results (positive:1, negative:0)	Status (d)	Ref.
				compound only					vaccine only					vaccine plus compound					vaccine plus alum
				#1	#2	#3	#4	Mean	#1	#2	#3	#4	Mean	#1	#2	#3	#4	Mean	#1	#2	#3	#4	Mean		Compound only	Vaccine only	Vaccine plus compound	Vaccine plus alum
Acetic acid	64-19-7	695092-100ML	Sigma	<10	<10	<10	<10	<10	<10	<10	<10	<10	<10	<10	<10	<10	<10	<10	1280	1280	5120	640	2080	NA	0/4	0/4	0/4	2/4	0	0
Aluminium stearate, Mono	7047-84-9	017-08615	Wako	<10	<10	<10	<10	<10	<10	<10	<10	<10	<10	<10	<10	80	<10	NA (e)	1280	1280	1280	2560	1600	NA	0/4	0/4	0/4	2/4	0	0
Ammonium acetate	631-61-8	A7330-100G	Sigma	<10	<10	<10	<10	<10	<10	<10	<10	<10	<10	320	640	1280	2560	1200	1280	640	1280	1280	1120	1.07143	0/4	0/4	2/4	2/4	50	1	a
Benzyl alcohol	100-51-6	B2378	TCI	<10	<10	<10	<10	<10	<10	<10	<10	<10	<10	<10	<10	<10	<10	<10	1280	1280	1280	2560	1600	NA	0/4	0/4	0/4	2/4	0	0
Benzyl benzoate	120-51-4	B6630-250ML	Sigma	<10	<10	<10	<10	<10	<10	<10	<10	<10	<10	320	1280	80	160	460	1280	2560	160	1280	1320	0.348485	0/4	0/4	0/4	2/4	0	0	a
Castor oil	8001-79-4	259853-250ML	Sigma	<10	<10	<10	<10	<10	<10	<10	<10	<10	<10	<10	<10	<10	<10	<10	5120	640	1280	2560	2400	NA	0/4	0/4	0/4	2/4	0	0
Chlorobutanol	6001-64-5	036-02222	Wako	<10	<10	<10	<10	<10	<10	<10	<10	<10	<10	320	2560	2560	1280	1680	1280	640	1280	1280	1120	1.5	0/4	0/4	3/4	2/4	75	1	a
Dextran 40	9004-54-0	D1448	TCI	<10	<10	<10	<10	<10	20	<10	<10	10	NA	1280	1280	2560	2560	1920	2560	1280	1280	160	1320	1.45455	0/4	0/4	3/4	3/4	75	1	b	Houston et al., Infect Immun, 1976; Joo, I. and J. Emod, Vaccine, 1988; achelder et al., Mol Pharm, 2010.
EMANON CH-25 (Polyoxyethylene hardened castor oil)	61788-85-0		Kao Chemicals	<10	<10	<10	<10	<10	<10	<10	<10	<10	<10	1280	5120	5120	2560	3520	5120	640	1280	2560	2400	1.46667	0/4	0/4	4/4	2/4	100	1	a
EMANON CH-40 (Polyoxyethylene hardened castor oil)	61788-85-0		Kao Chemicals	<10	<10	<10	<10	<10	<10	<10	<10	<10	<10	2560	1280	640	2560	1760	5120	640	1280	2560	2400	0.733333	0/4	0/4	3/4	2/4	75	1	a
EMANON CH-60K (Polyoxyethylene hardened castor oil)	61788-85-0		Kao Chemicals	<10	<10	<10	<10	<10	<10	<10	<10	<10	<10	5120	2560	1280	5120	3520	5120	640	1280	2560	2400	1.46667	0/4	0/4	4/4	2/4	100	1	a
Ethanol	64-17-5	057-00456	Wako	<10	<10	<10	<10	<10	<10	<10	<10	<10	<10	640	320	320	320	400	640	640	320	1280	720	0.555556	0/4	0/4	3/4	3/4	75	1	b	Das et al., Vaccine, 2012.
Ethyl lactate	97-64-3	L0003	TCI	<10	<10	<10	<10	<10	20	<10	<10	10	NA	<10	<10	<10		<10 (f)	2560	1280	1280	160	1320	NA	0/4	0/4	0/3	3/4	0	0
Ethyl oleate	111-62-6	75100-250ML	Sigma	<10	<10	<10	<10	<10	<10	<10	<10	<10	<10	10	320	80	320	182.5	1280	1280	1280	2560	1600	0.114062	0/4	0/4	0/4	2/4	0	0
Ethylurea	625-52-5	E0192	TCI (Tokyo Chemical Industry Co., Ltd. )	<10	<10	<10	<10	<10	<10	<10	<10	<10	<10	<10	<10	<10	<10	<10	1280	2560	160	1280	1320	NA	0/4	0/4	1/4	2/4	25	0
D-Gluconic acid sodium salt	527-07-1	G9005-500G	Sigma	<10	<10	<10	<10	<10	<10	<10	<10	<10	<10	1280	1280	1280	2560	1600	1280	1280	1280	2560	1600	1	0/4	0/4	3/4	2/4	75	1	a
Gum arabic (from acacia tree)	9000-01-5	12-1820-5-500G-J	Sigma	<10	<10	<10	<10	<10	<10	<10	<10	<10	<10	1280	1280	2560	320	1360	1280	1280	1280	2560	1600	0.85	0/4	0/4	3/4	2/4	75	1	b	Galliher-Beckley et al., Vaccine, 2015.
Hydroxypropyl cellulose	9004-64-2	088-07922	Wako	<10	<10	<10	<10	<10	<10	<10	<10	<10	<10	1280	10240	5120	5120	5440	1280	1280	5120	640	2080	2.61538	0/4	0/4	4/4	2/4	100	1	a
Magnesium sulfate	7487-88-9	M1890	TCI	<10	<10	<10	<10	<10	<10	<10	<10	<10	<10	<10	<10	<10	<10	<10	1280	1280	1280	2560	1600	NA	0/4	0/4	0/4	2/4	0	0
Metasuruho sodium benzoate	17625-03-5	329-42102	Wako	<10	<10	<10	<10	<10	<10	<10	<10	<10	<10	<10	<10	20	<10	NA	1280	1280	1280	2560	1600	NA	0/4	0/4	0/4	2/4	0	0
Methyl parahydroxybenzoate	99-76-3	135-18291	Wako	<10	<10	<10	<10	<10	<10	<10	<10	<10	<10	<10	<10	<10	<10	<10	1280	1280	5120	640	2080	NA	0/4	0/4	0/4	2/4	0	0
Myristoyl-ɣ-picolinium chloride	l	M885030	Toronto Research Chemicals Inc.	<10	<10	<10	<10	<10	<10	<10	<10	<10	<10	<10	<10	<10	<10	<10	1280	1280	5120	640	2080	NA	0/4	0/4	1/4	2/4	25	0
Phenol	108-95-2	P5566-25G	Sigma	<10	<10	<10	<10	<10	<10	<10	<10	<10	<10	<10	<10	<10	<10	<10	5120	640	1280	2560	2400	NA	0/4	0/4	0/4	2/4	0	0
Polyethylene glycol 4000	25322-68-3	P0885	TCI	<10	<10	<10	<10	<10	<10	<10	<10	<10	<10	640	1280	<10	1280	NA	1280	1280	1280	2560	1600	NA	0/4	0/4	2/4	2/4	50	1	b	Wang et al., [Effect of polyethylene glycol as adjuvant on hepatitis B virus DNA vaccine in vitro].Wei Sheng Wu Xue Bao, 2010.[Article in Chinese]
Polyoxyethylene polyoxypropylene glycol (160E.O.) (30P.O.)	9003-11-6	160-25231	Wako	<10	<10	<10	<10	<10	<10	<10	<10	<10	<10	2560	2560	2560	2560	2560	5120	640	1280	2560	2400	1.06667	0/4	0/4	4/4	2/4	100	1	b	Snippe et al., Int Arch Allergy Appl Immunol, 1981; Shakya, A.K. and K.S. Nandakumar, J R Soc Interface, 2013; Valpotic et al., Acta Vet Scand, 2013.
Potassium aluminum sulfate	7784-24-9	237086-100G	Sigma	<10	<10	<10	<10	<10	<10	<10	<10	<10	<10	<10	<10	<10	10	<10	1280	1280	1280	2560	1600	NA	0/4	0/4	0/4	2/4	0	0
Potassium chloride	7447-40-7	793590-500G	Sigma	<10	<10	<10	<10	<10	<10	<10	<10	<10	<10	1280	5120	5120	160	2920	1280	1280	1280	2560	1600	1.825	0/4	0/4	2/4	2/4	50	1	a
1,2-Propanediol	57-55-6	P0485	TCI	<10	<10	<10	<10	<10	<10	<10	<10	<10	<10	<10	<10	<10	<10	<10	5120	640	1280	2560	2400	NA	0/4	0/4	0/4	2/4	0	0
RHEODOL AO-15V (Sorbitan sesquioleate)	8007-43-0		Kao Chemicals	<10	<10	<10	<10	<10	20	<10	<10	10	NA	2560	2560	5120	2560	3200	2560	1280	1280	160	1320	2.42424	0/4	0/4	3/4	3/4	75	1	b	Fukanoki et al., Avian Diseases, 2000; Fukanoki, S., et al., Avian Pathol, 2001.
Sodium acetate	127-09-3	198-01072	Wako	<10	<10	<10	<10	<10	<10	<10	<10	<10	<10	1280	1280	80	320	740	1280	640	1280	1280	1120	0.660714	0/4	0/4	2/4	2/4	50	1	a
Sodium benzoate	532-32-1	V800367-500G	Sigma	<10	<10	<10	<10	<10	<10	<10	<10	<10	<10	2560	1280	1280	1280	1600	1280	2560	160	1280	1320	1.21212	0/4	0/4	4/4	2/4	100	1	a
Sodium bisulfite	7631-90-5	28-1970-5-500G-J	Sigma	<10	<10	<10	<10	<10	<10	<10	<10	<10	<10	2560	160	40	160	730	1280	2560	160	1280	1320	0.55303	0/4	0/4	3/4	2/4	75	1	a
Sodium bromide	7647-15-6	S4547-100G	Sigma	<10	<10	<10	<10	<10	<10	<10	<10	<10	<10	1280	1280	40	1280	970	1280	640	1280	1280	1120	0.866071	0/4	0/4	3/4	2/4	75	1	a
Sodium formaldehydesulfoxylate	149-44-0	30219-85	Nacalai	<10	<10	<10	<10	<10	20	<10	<10	10	NA	<10	<10	<10	<10	<10	2560	1280	1280	160	1320	NA	0/4	0/4	0/4	3/4	0	0
Sodium metabisulfite	7681-57-4	31448-500G	Sigma	<10	<10	<10	<10	<10	<10	<10	<10	<10	<10	<10	<10	<10	<10	<10	1280	1280	5120	640	2080	NA	0/4	0/4	0/4	2/4	0	0
Sodium salicylate	54-21-7	S2679-100G	Sigma	<10	<10	<10	<10	<10	<10	<10	<10	<10	<10	640	40	40	10	182.5	1280	640	1280	1280	1120	0.162946	0/4	0/4	1/4	2/4	25	0
Sodium sulfite	7757-83-7	V800402-500G	Sigma	<10	<10	<10	<10	<10	<10	<10	<10	<10	<10	2560	2560	2560	640	2080	1280	1280	1280	2560	1600	1.3	0/4	0/4	4/4	2/4	100	1	a
Sodium thioglycolate (Mercaptoacetic acid)	367-51-1	T0632-25G	Sigma	<10	<10	<10	<10	<10	20	<10	<10	10	NA	<10	<10	<10	160	NA	2560	1280	1280	160	1320	NA	0/4	0/4	1/4	3/4	25	0
Sodium thiomalate (Thiomalic acid+2NaOH)	12244-57-4		TOYOBO	<10	<10	<10	<10	<10	<10	<10	<10	<10	<10	<10	<10	<10	<10	<10	1280	1280	5120	640	2080	NA	0/4	0/4	0/4	2/4	0	0
Sodium thiosulfate	10102-17-7	S0568	TCI	<10	<10	<10	<10	<10	20	<10	<10	10	NA	160	1280	1280	2560	1320	2560	1280	1280	160	1320	1	0/4	0/4	3/4	3/4	75	1	a
1-Thioglycerol	96-27-5	M2172-10ML	Sigma	<10	<10	<10	<10	<10	<10	<10	<10	<10	<10	<10	1280	40	80	NA	1280	2560	160	1280	1320	NA	0/4	0/4	1/4	2/4	25	0
Trometamol	77-86-1	T1503-25G	Sigma	<10	<10	<10	<10	<10	20	<10	<10	10	NA	<10	10	10	40	NA	2560	1280	1280	160	1320	NA	0/4	0/4	0/4	3/4	0	0
Urea	57-13-6	U5378-100G	Sigma	<10	<10	<10	<10	<10	<10	<10	<10	<10	<10	<10	<10	<10	<10	<10	1280	1280	5120	640	2080	NA	0/4	0/4	0/4	2/4	0	0
Xylitol	87-99-0	PHR1280-1G	Sigma	<10	<10	<10	<10	<10	<10	<10	<10	<10	<10	640	320	640	640	560	1280	1280	1280	2560	1600	0.35	0/4	0/4	2/4	2/4	50	1	a
Zinc chloride	7646-85-7	V800450-500G	Sigma	<10	<10	<10	<10	<10	<10	<10	<10	<10	<10	<10	<10	<10	<10	<10	1280	1280	1280	2560	1600	NA	0/4	0/4	1/4	2/4	25	0
Zinc oxide	1314-13-2	V800450-500G	Sigma	<10	<10	<10	<10	<10	<10	<10	<10	<10	<10	2560	320	20	320	805	1280	640	1280	1280	1120	0.71875	0/4	0/4	0/4	2/4	0	0	b	Matsumura et al., Immunopharmacol Immunotoxicol, 2010.
(a)Six-week-old BALB/c mice were intramuscularly immunized with the indicated immunogens (100 μl) twice with a two-week interval between immunizations. Four mice were used per group. The serum samples were collected two weeks after the second immunization to measure the virus-specific antibody titers. (b)The virus-specific antibody titers (Ab. titers) were determined by use of an ELISA with inact…
